# Supplementary material for: Staphylococcus aureus RnpA Inhibitors: Computational-Guided Design, Synthesis and Initial Biological Evaluation
Source: MDPI journal article supplement (doi:10.3390/antibiotics10040438), 2021-04-14

# Supporting Information

## **“*Staphylococcus aureus* RnpA Inhibitors: Computational-Guided Design, Synthesis and Initial Biological Evaluation”**

Lorenzo Suigo, Michaelle Chojnacki, Carlo Zanotto, Victor Sebastián-Pérez, Carlo De Giuli Morghen, Andrea Casiraghi, Paul M. Dunman, Ermanno Valoti and Valentina Straniero \*

### Summary

|                                                                                               |    |
|-----------------------------------------------------------------------------------------------|----|
| 1-(4-biphenyl)-3-(2-methylpiperidin-1-yl)urea (1).....                                        | 2  |
| 1-(3-biphenyl)-3-(2-methylpiperidin-1-yl)urea (2).....                                        | 4  |
| 1-(2-biphenyl)-3-(2-methylpiperidin-1-yl)urea (3).....                                        | 6  |
| 1-(3,5-dichlorophenyl)-3-(1,2,3,4-tetrahydroquinolin-1-yl)urea (4).....                       | 8  |
| 1-(3,5-dichlorophenyl)-3-(1,2,3,4-tetrahydroisoquinolin-1-yl)urea (5) .....                   | 10 |
| 1-(4- <i>i</i> -propylphenoxyacetyl)-4-(3,5-dichlorobenzoyl)thiosemicarbazide (6).....        | 12 |
| 1-(4- <i>i</i> -propylphenoxyacetyl)-4-(3-chlorobenzoyl)thiosemicarbazide (7).....            | 14 |
| 1-(4- <i>i</i> -propylphenoxyacetyl)-4-(3-bromobenzoyl)thiosemicarbazide (8) .....            | 16 |
| 1-(4- <i>i</i> -propylphenoxyacetyl)-4-(3,5-dibromobenzoyl)thiosemicarbazide (9).....         | 18 |
| 1-(4-biphenyloxyacetyl)-4-(3,5-dichlorobenzoyl)thiosemicarbazide (10) .....                   | 20 |
| 3,5-dichloro- <i>N</i> -((2-(4- <i>i</i> -propylphenoxy)acetamido)methyl)benzamide (11) ..... | 22 |
| 3,5-dichloro- <i>N</i> -((2-(4- <i>i</i> -propylphenoxy)acetamido)ethyl)benzamide (12) .....  | 24 |
| 4-(3,5-dichlorobenzoylamino)-1-(4- <i>i</i> -propylphenoxyacetyl)piperidine (13) .....        | 26 |
| 4-(3,5-dichlorobenzoyl)-1-(4- <i>i</i> -propylphenoxyacetyl)piperazine (14) .....             | 28 |

# 1-(4-biphenyl)-3-(2-methylpiperidin-1-yl)urea (1)

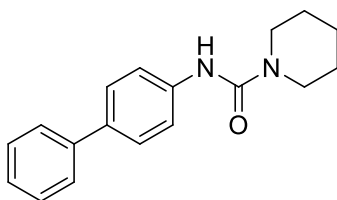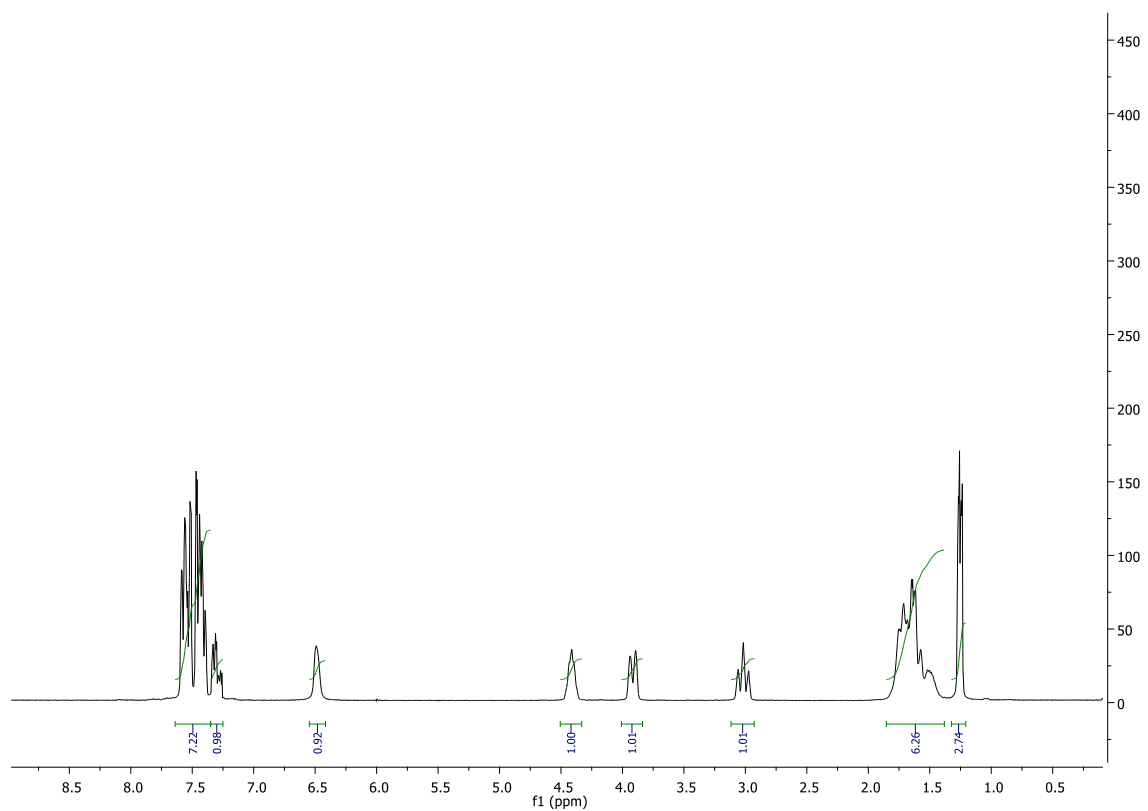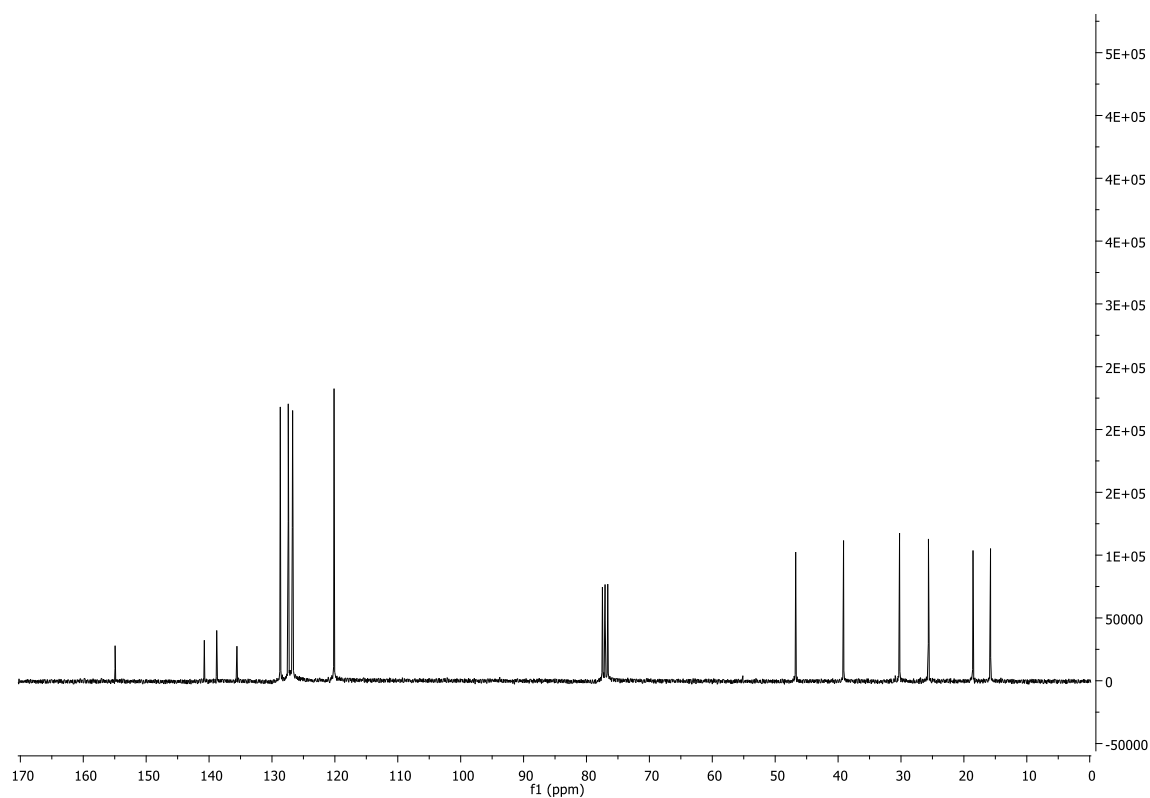

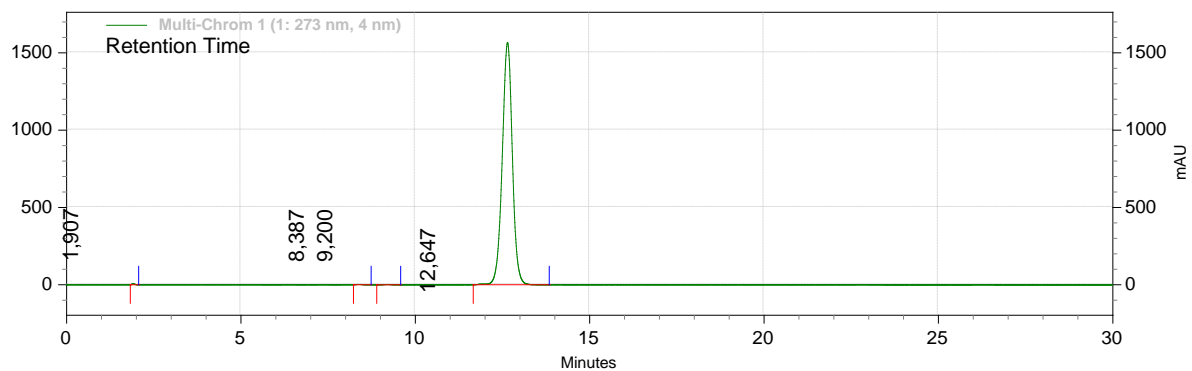

# 1-(3-biphenyl)-3-(2-methylpiperidin-1-yl)urea (2)

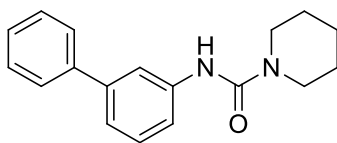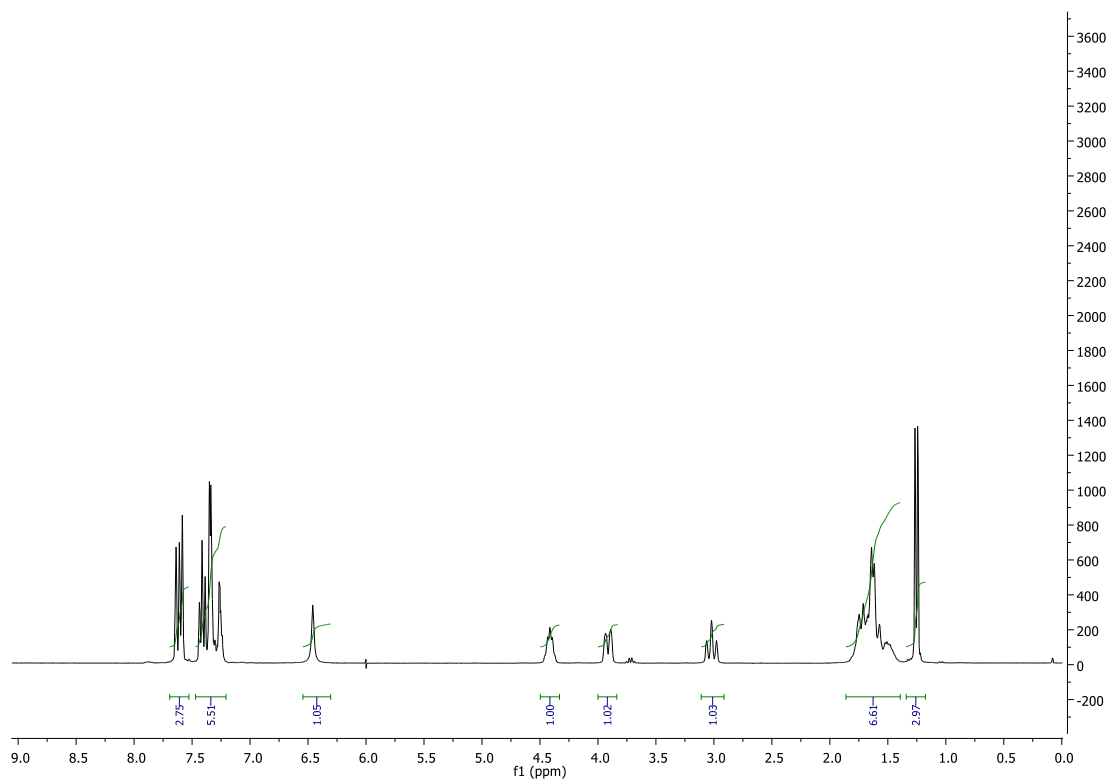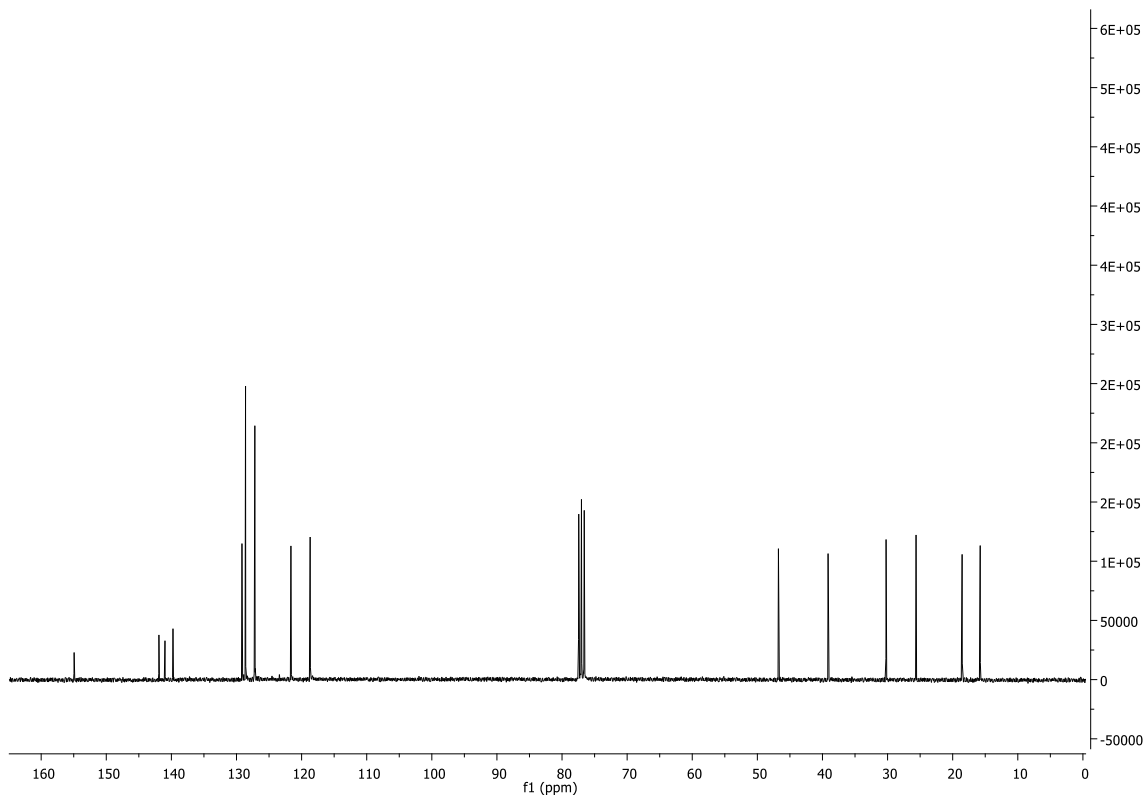

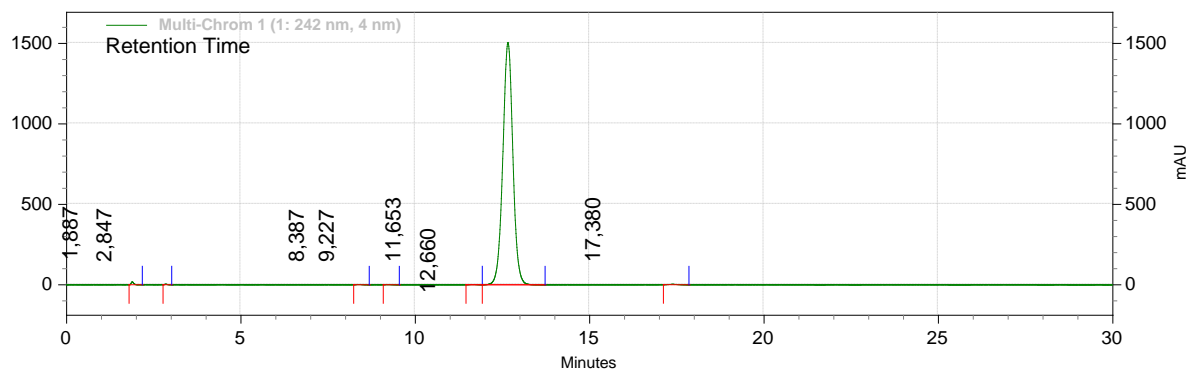

# 1-(2-biphenyl)-3-(2-methylpiperidin-1-yl)urea (3)

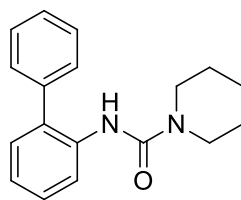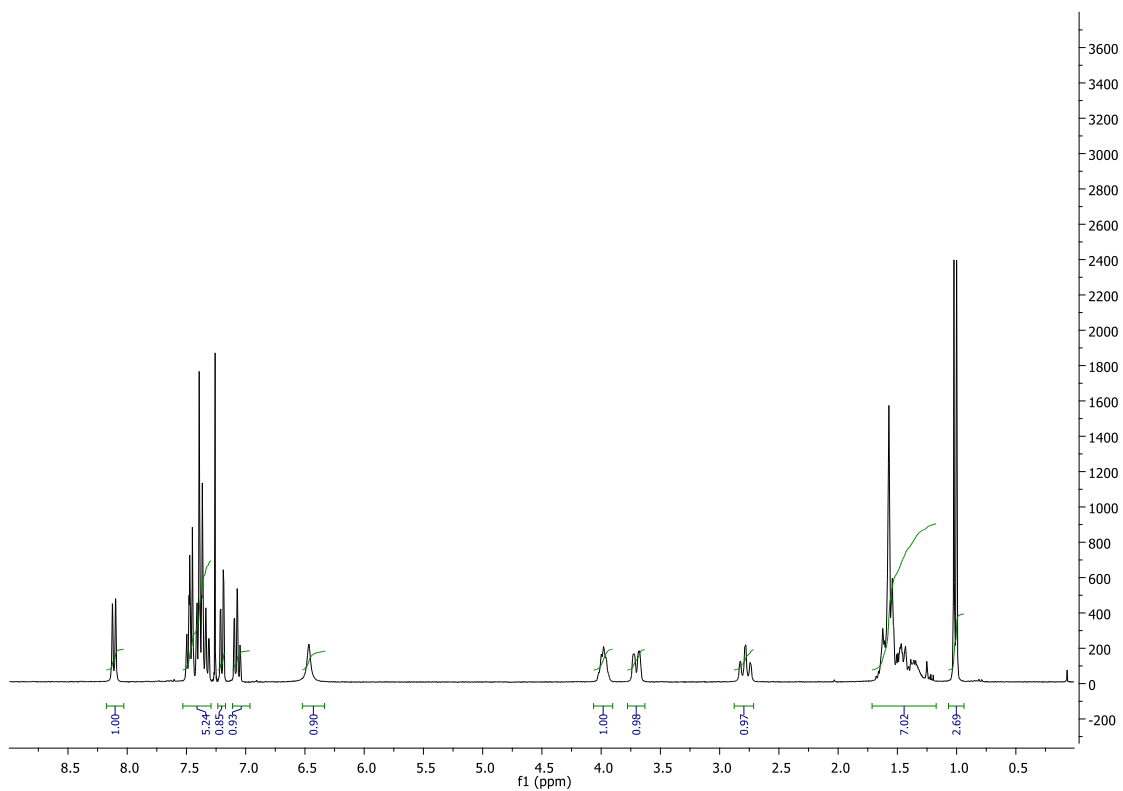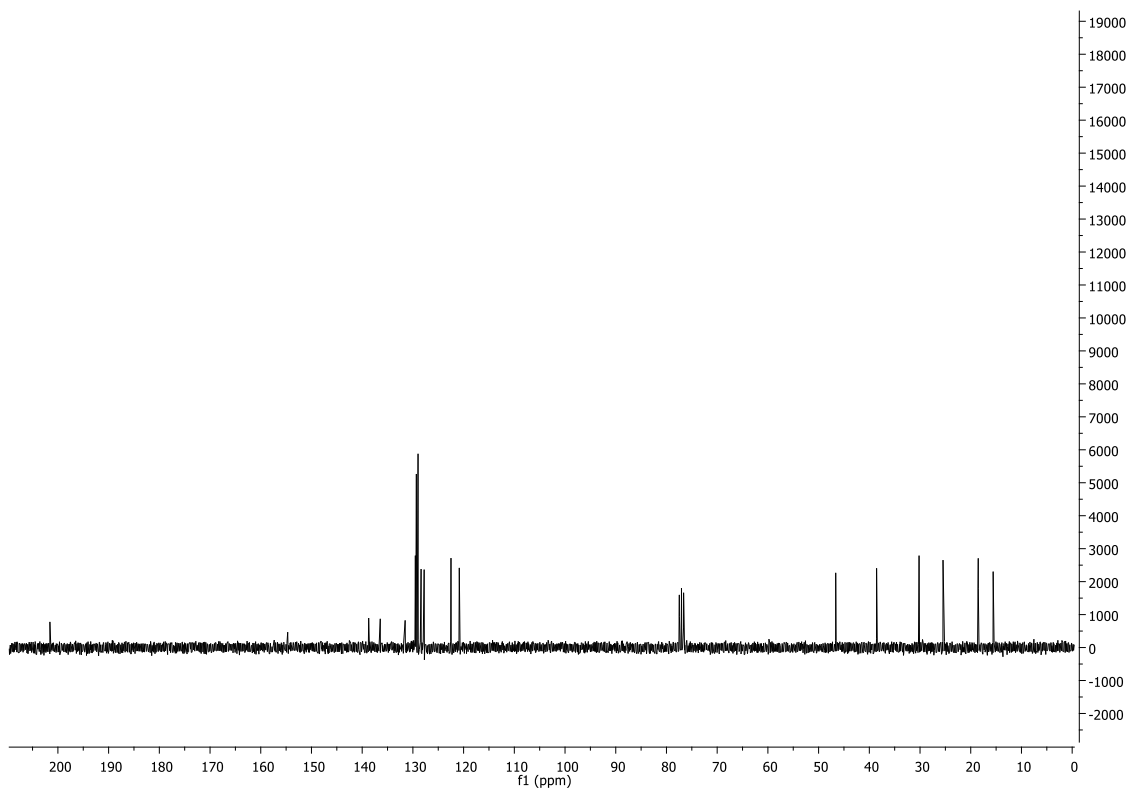

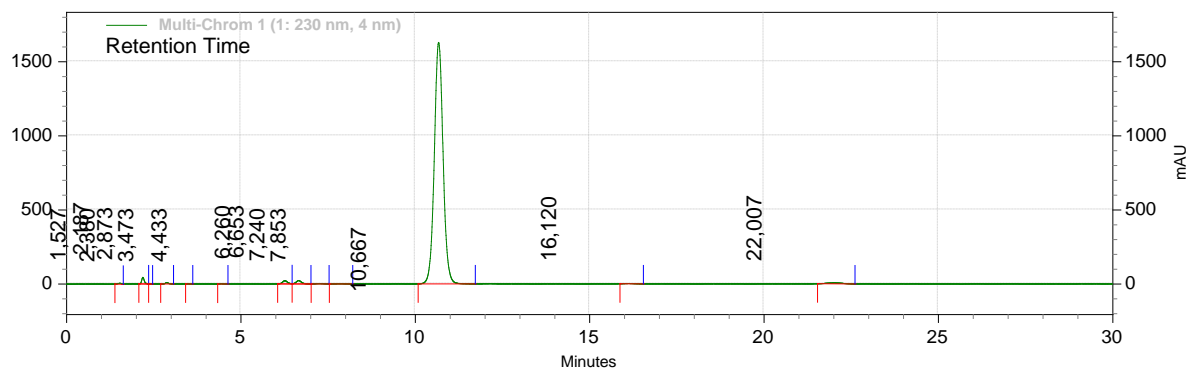

# 1-(3,5-dichlorophenyl)-3-(1,2,3,4-tetrahydroquinolin-1-yl)urea (4)

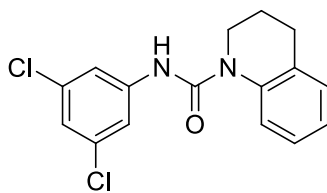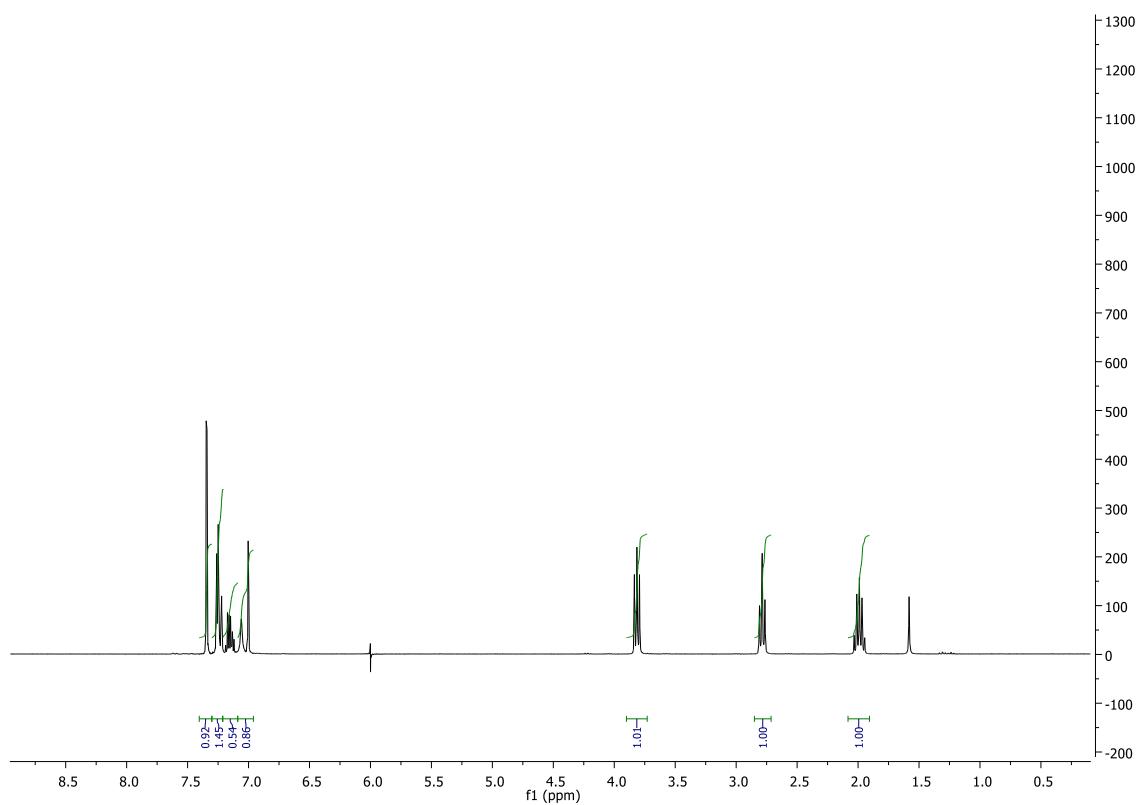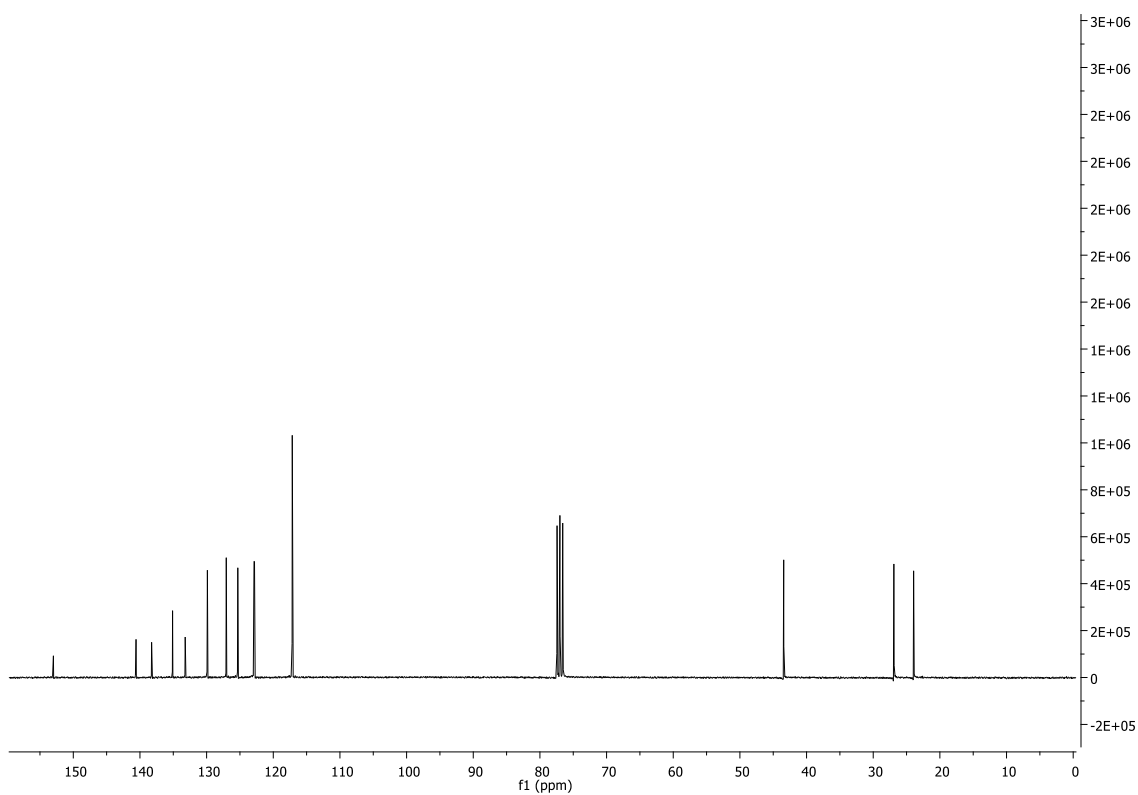



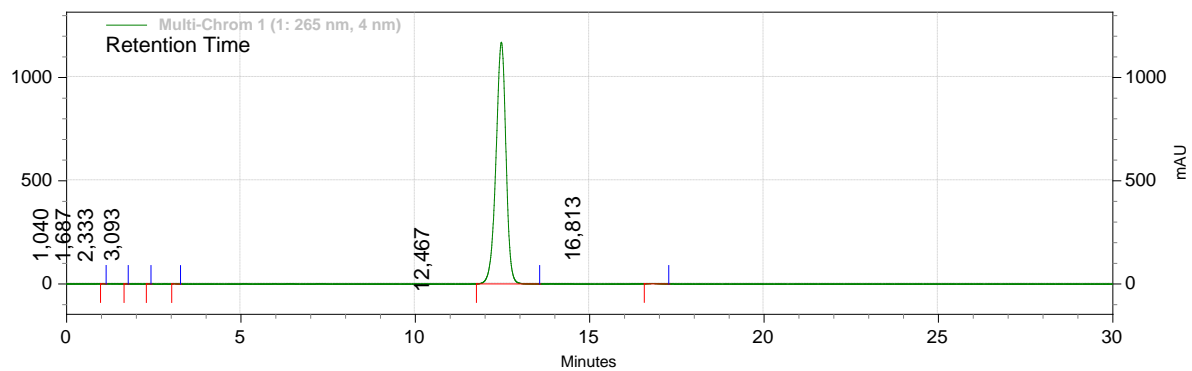

# 1-(3,5-dichlorophenyl)-3-(1,2,3,4-tetrahydroisoquinolin-1-yl)urea (5)

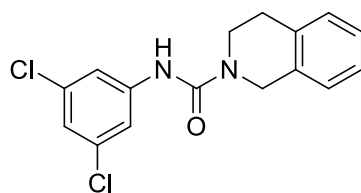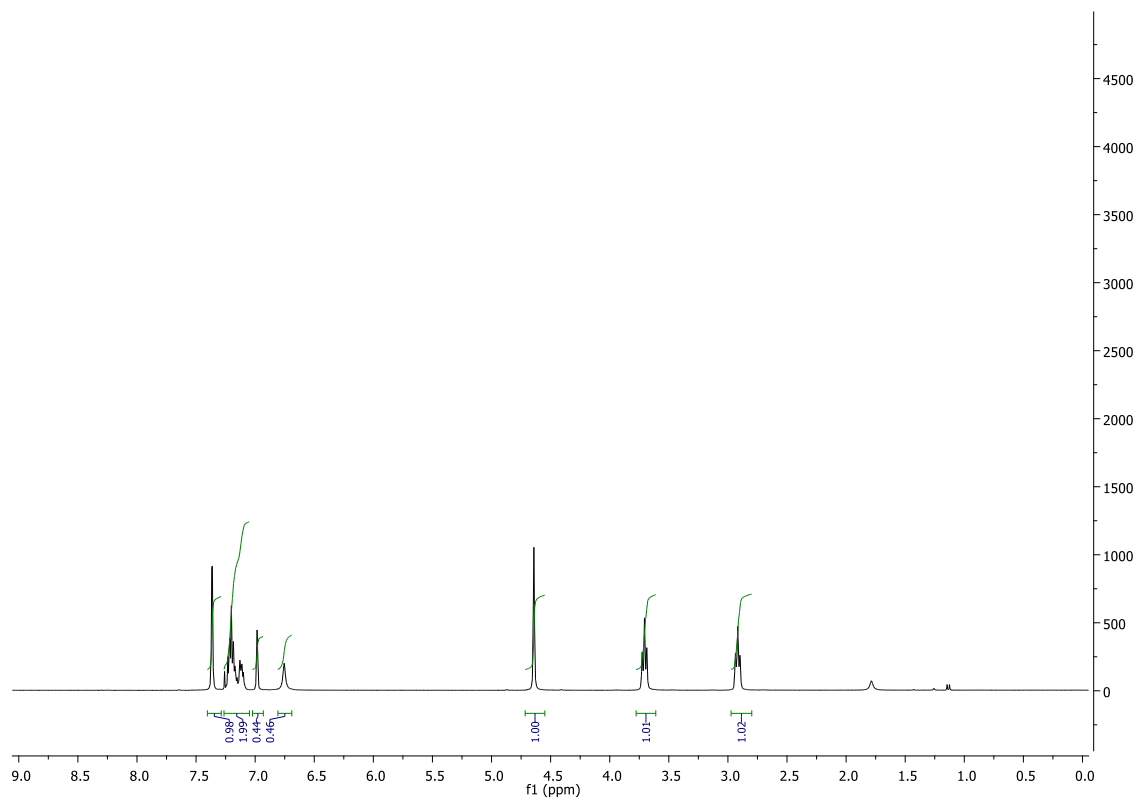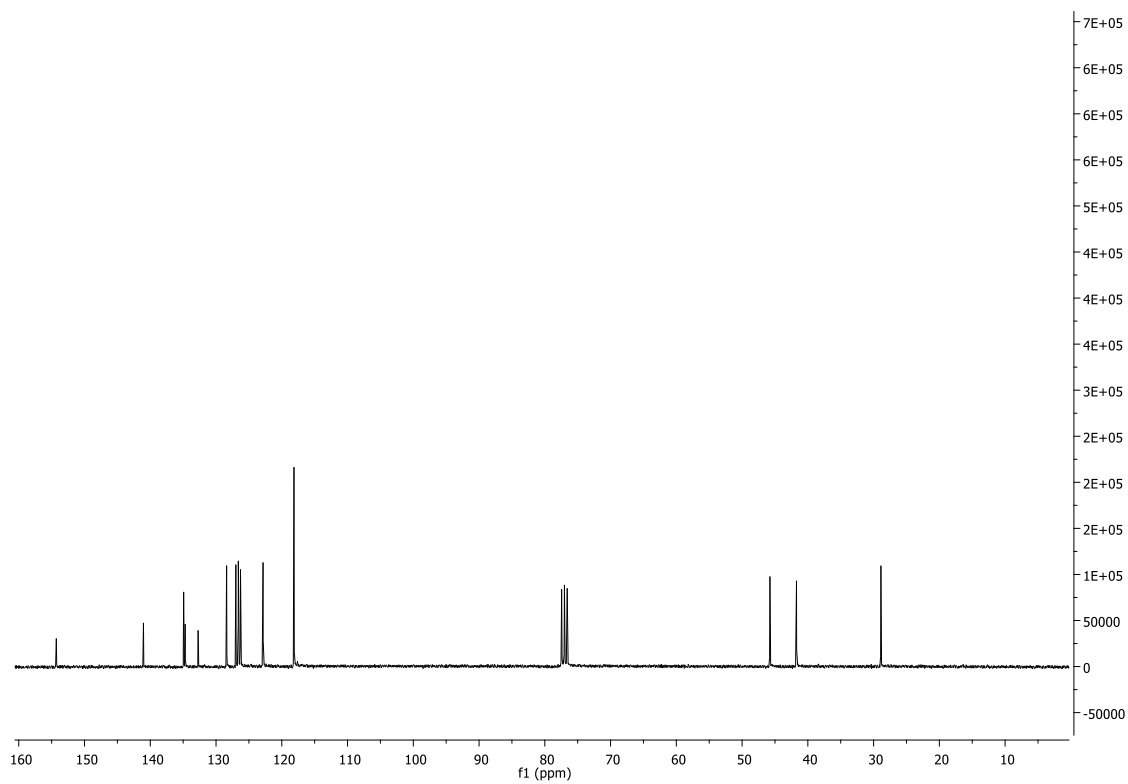

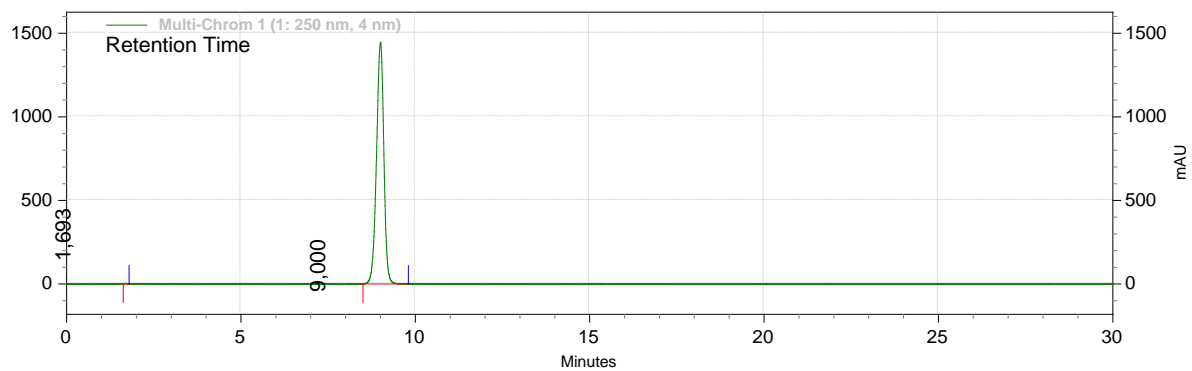

# 1-(4-*i*-propylphenoxyacetyl)-4-(3,5-dichlorobenzoyl)thiosemicarbazide (6)

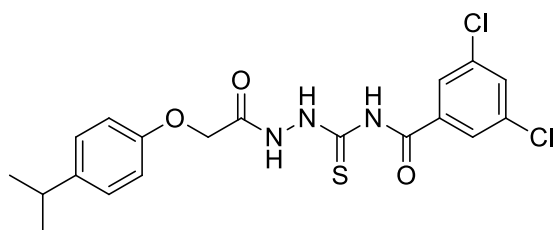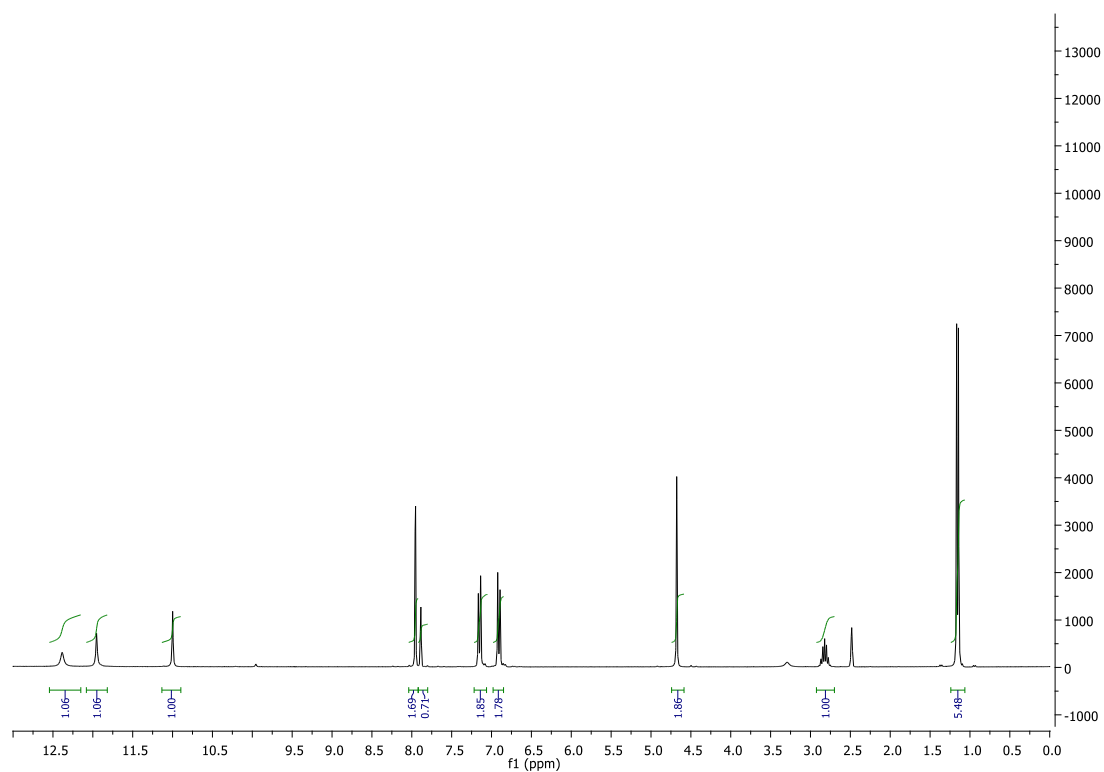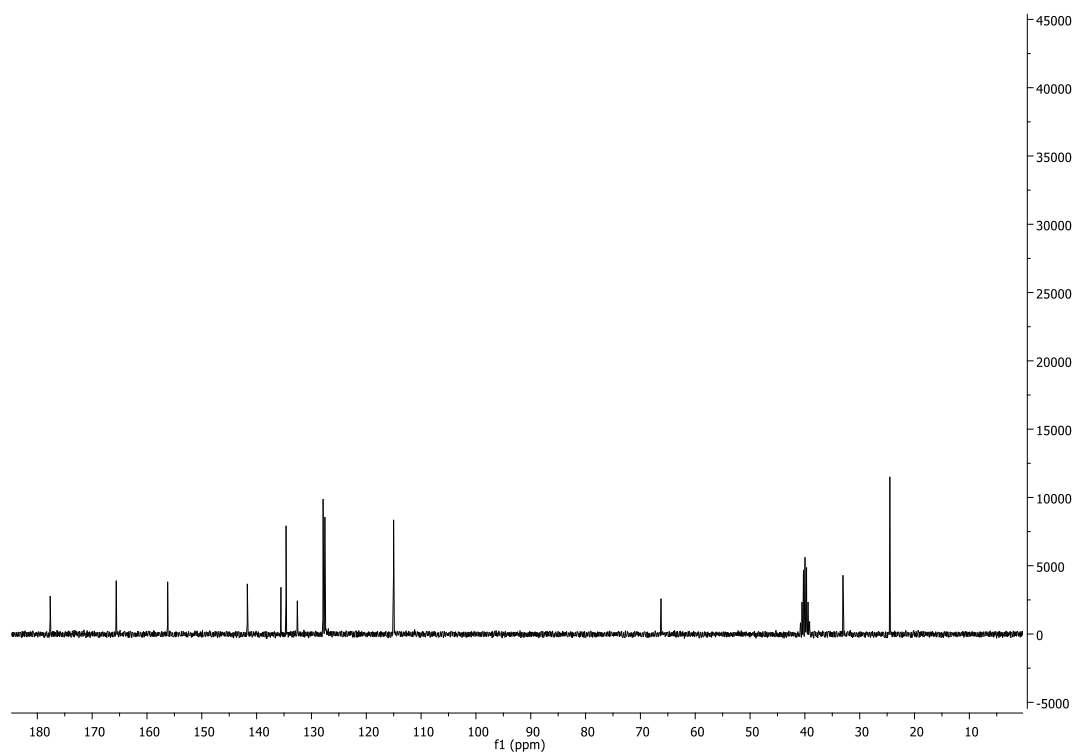

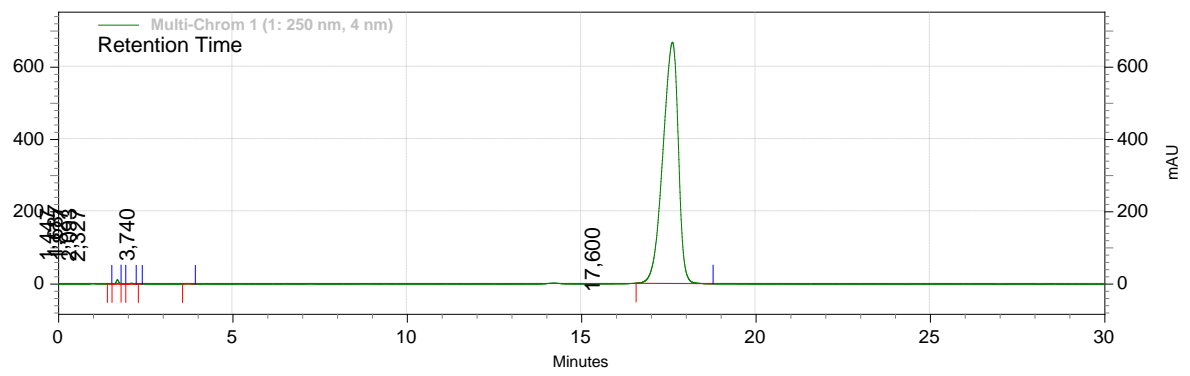

# 1-(4-*i*-propylphenoxyacetyl)-4-(3-chlorobenzoyl)thiosemicarbazide (7)

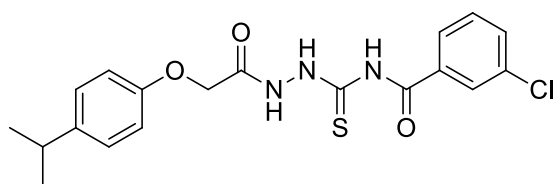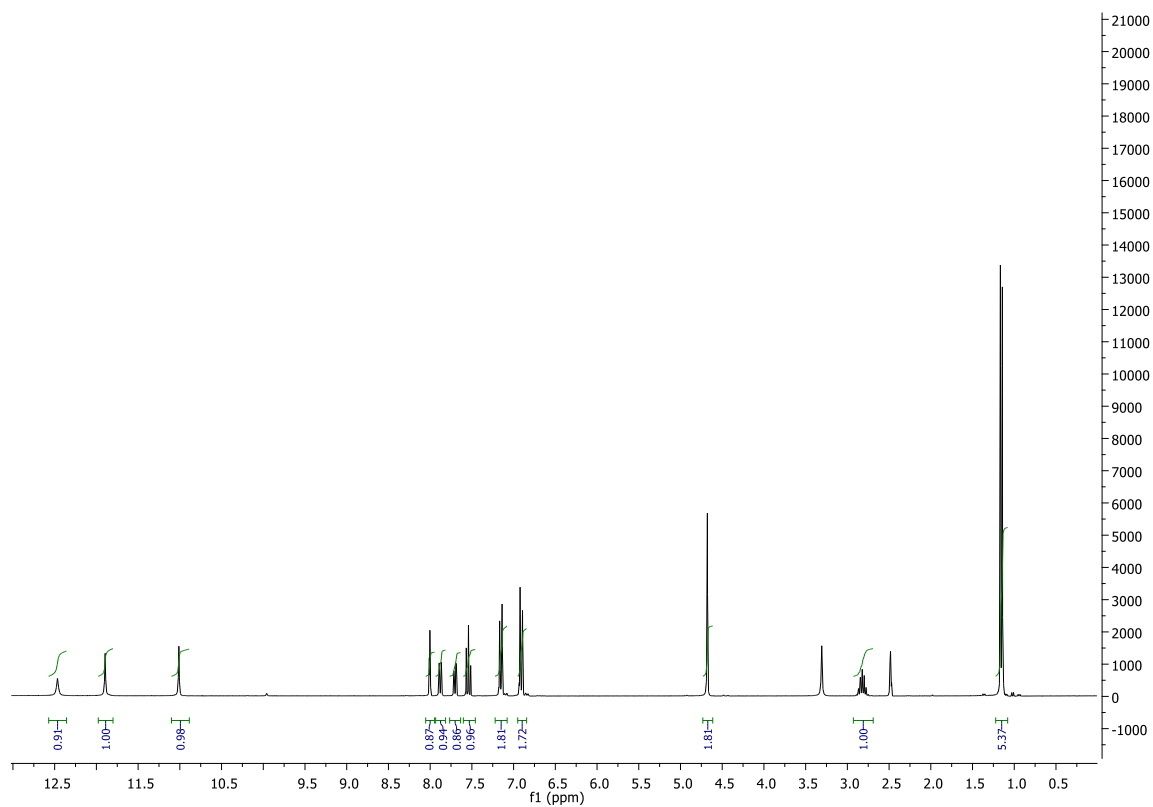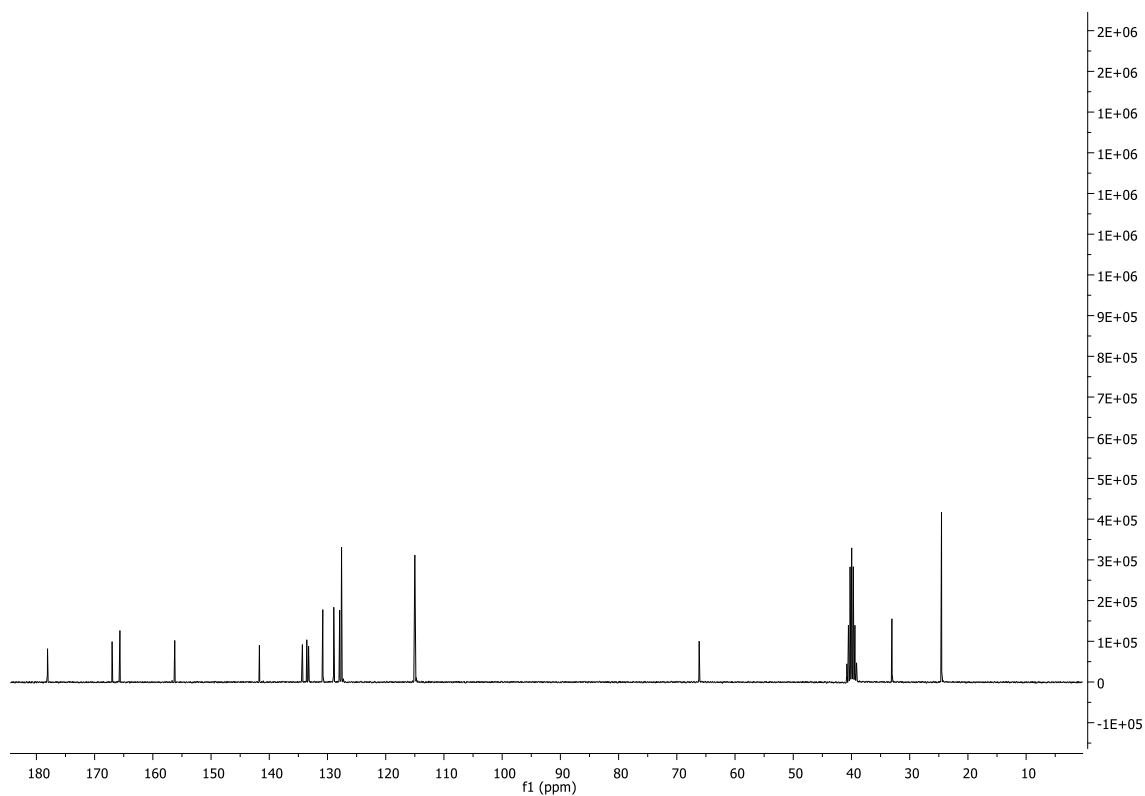

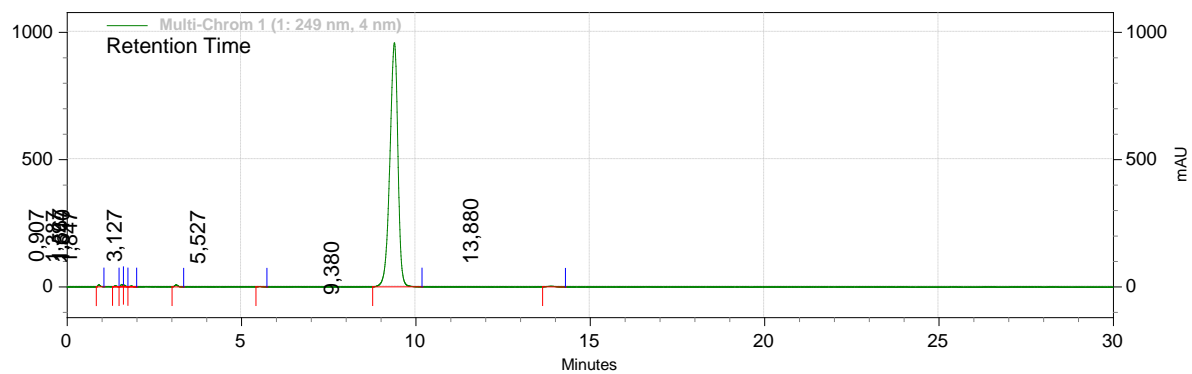

# 1-(4-*i*-propylphenoxyacetyl)-4-(3-bromobenzoyl)thiosemicarbazide (8)

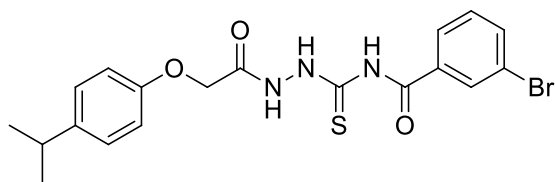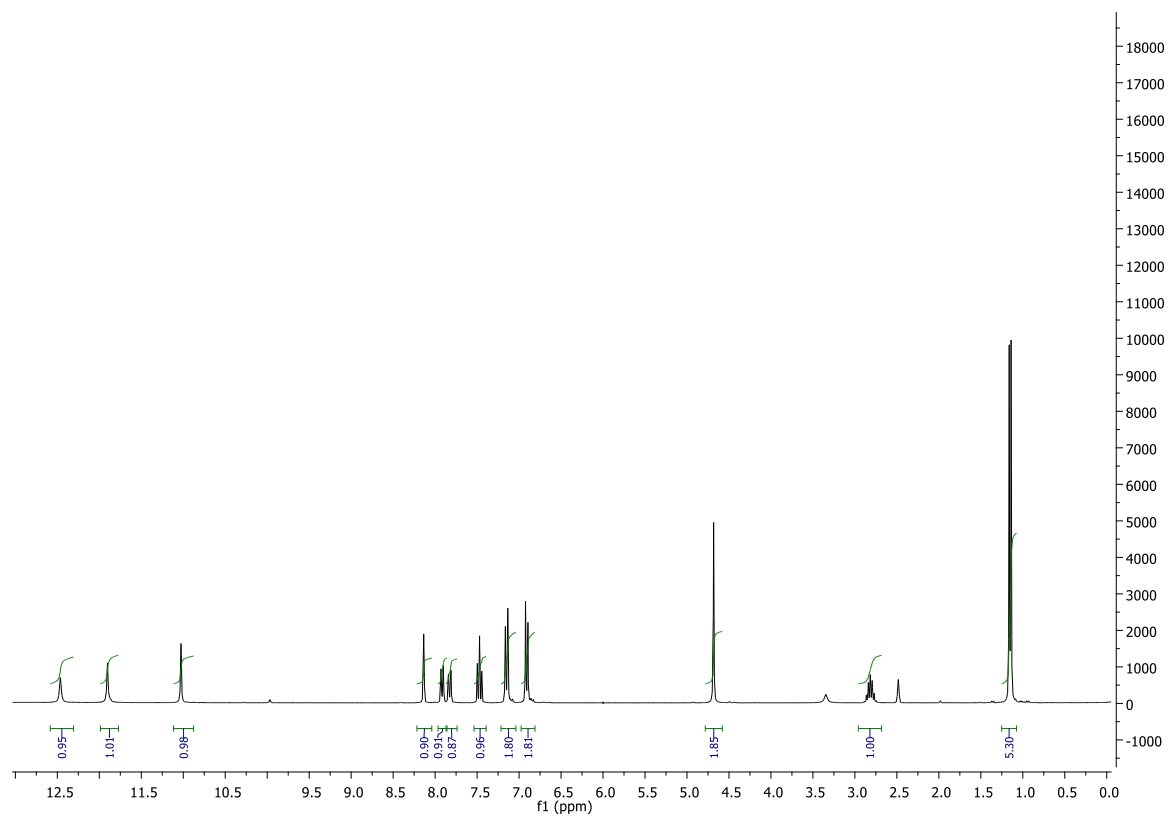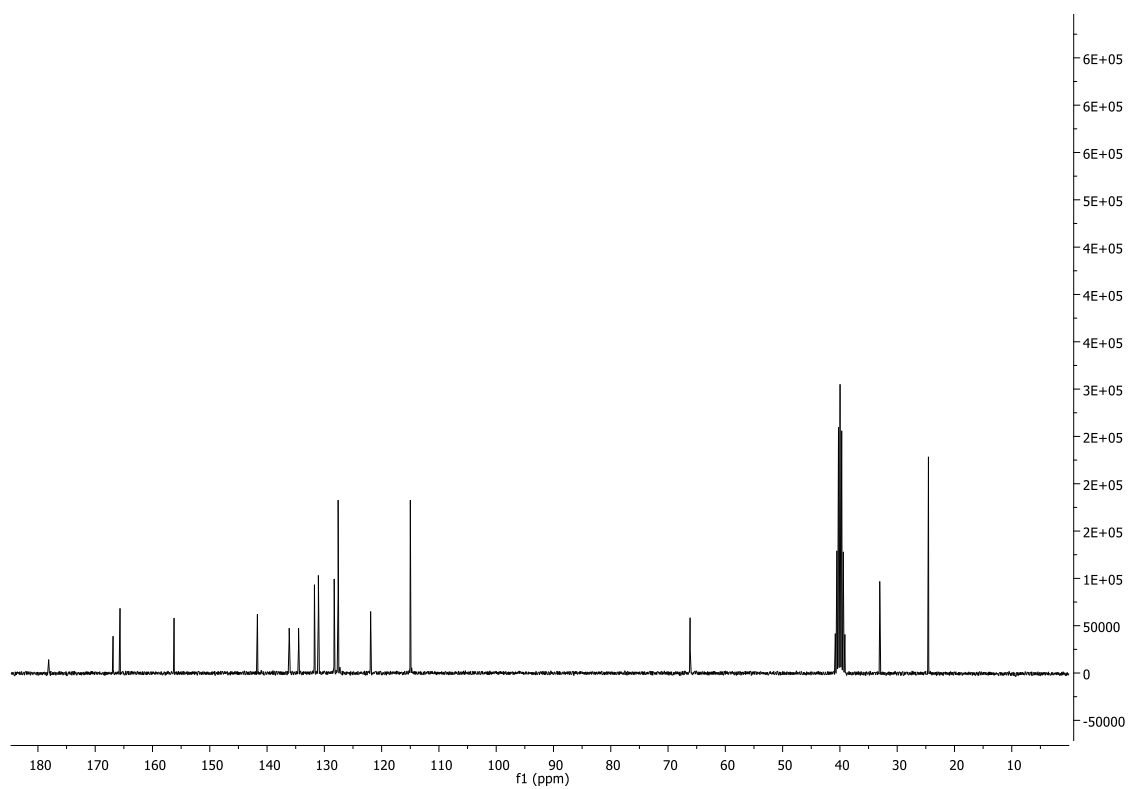



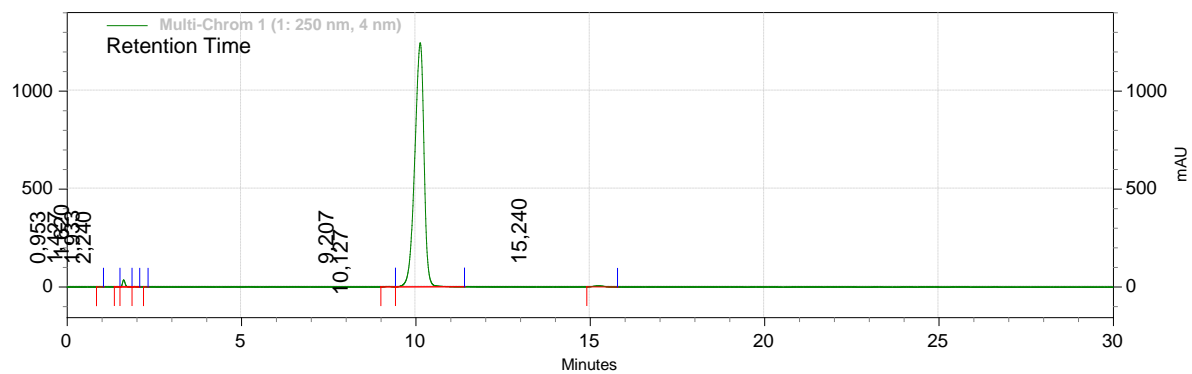

# 1-(4-*i*-propylphenoxyacetyl)-4-(3,5-dibromobenzoyl)thiosemicarbazide (9)

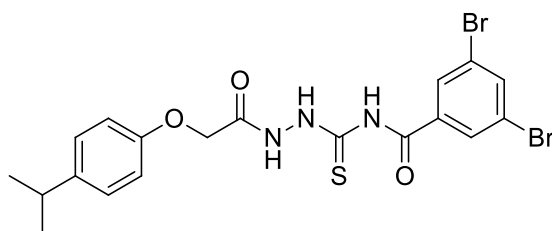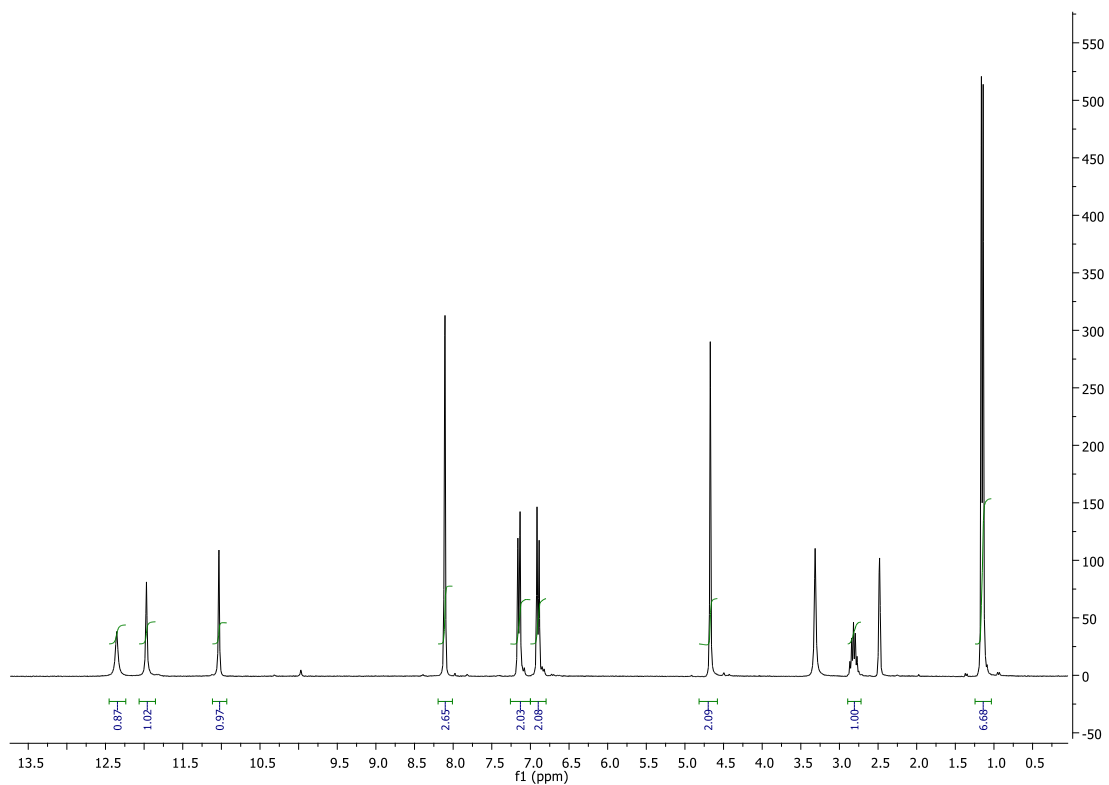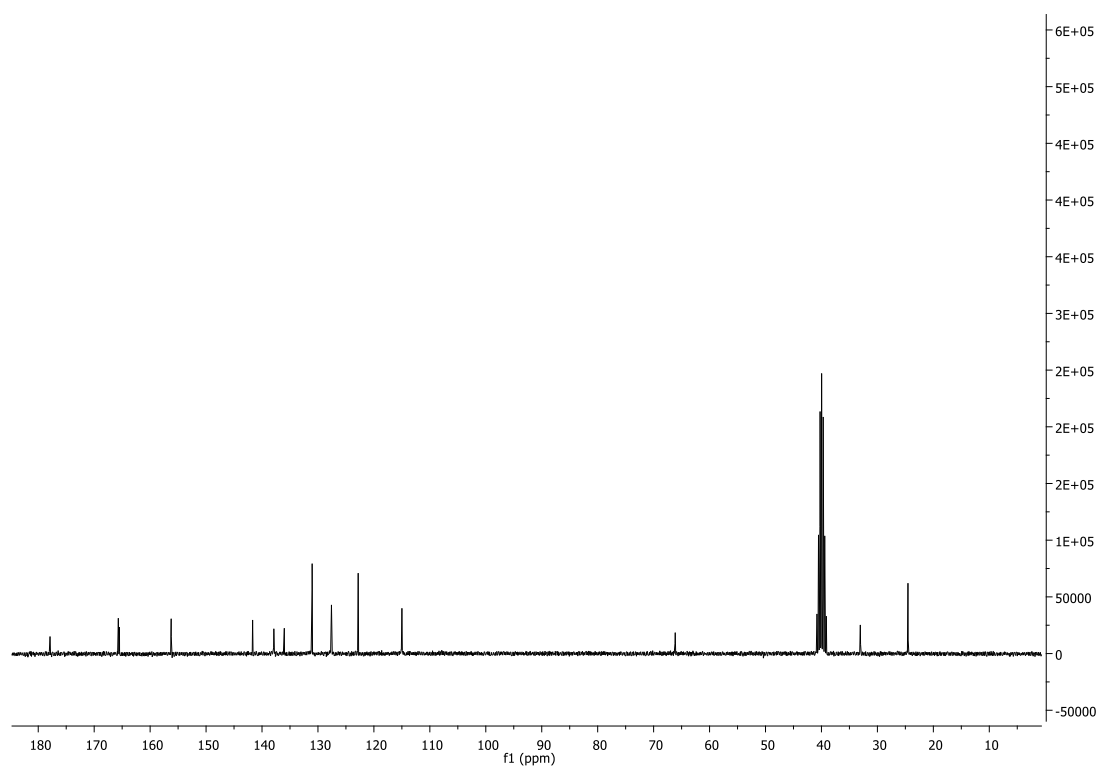

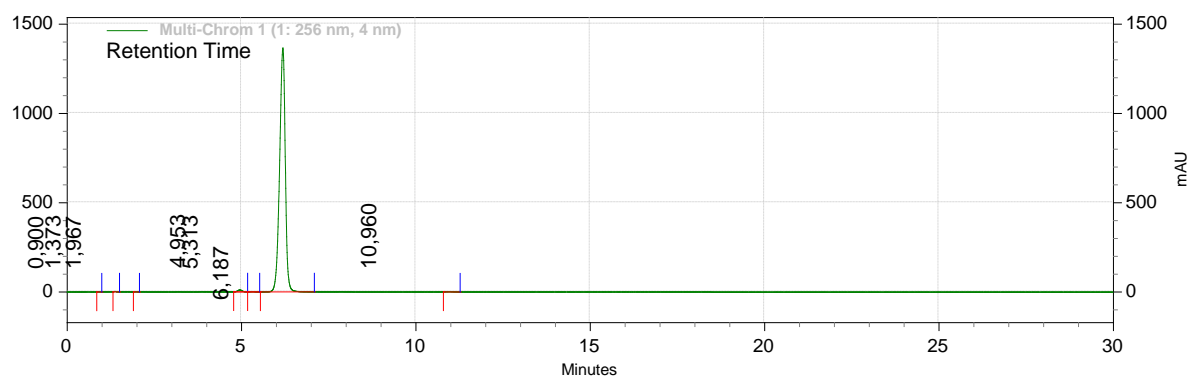

# 1-(4-biphenyloxyacetyl)-4-(3,5-dichlorobenzoyl)thiosemicarbazide (10)

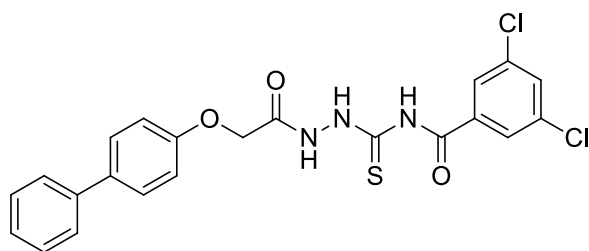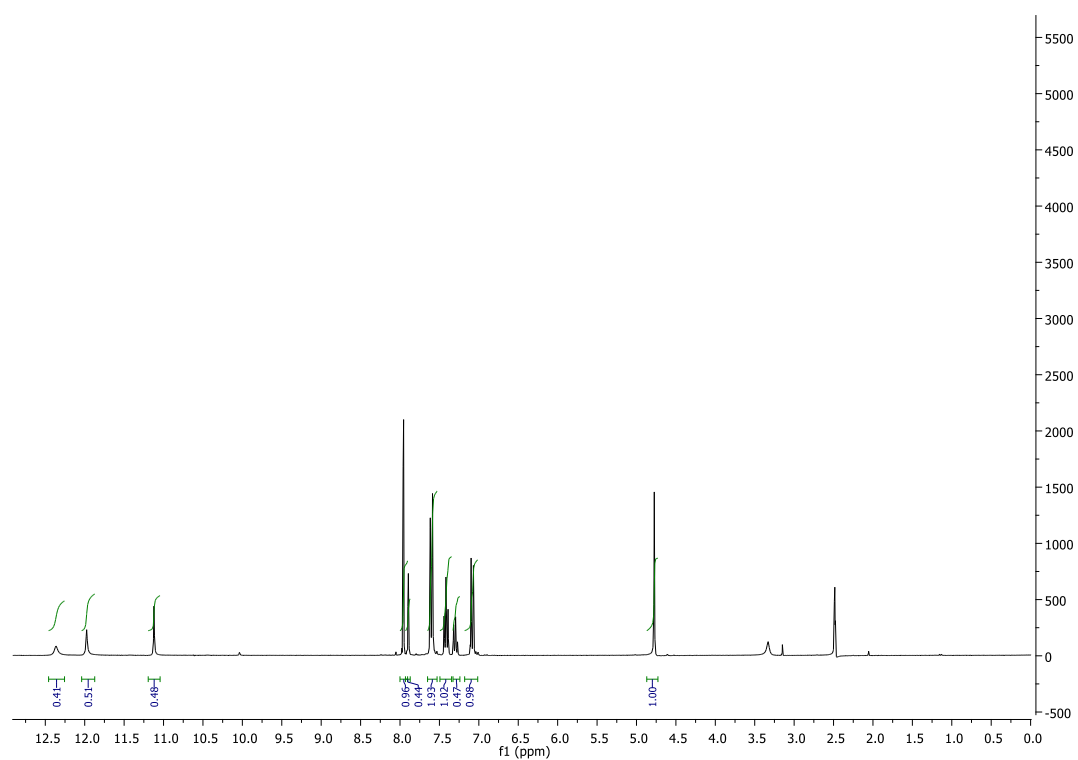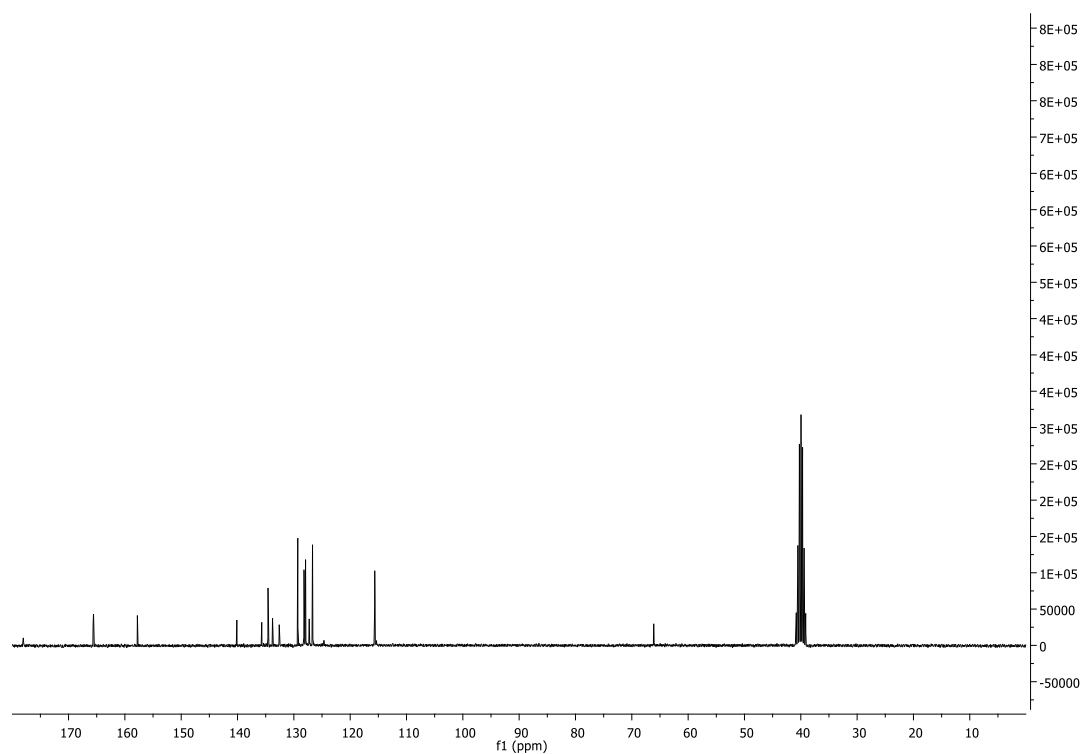

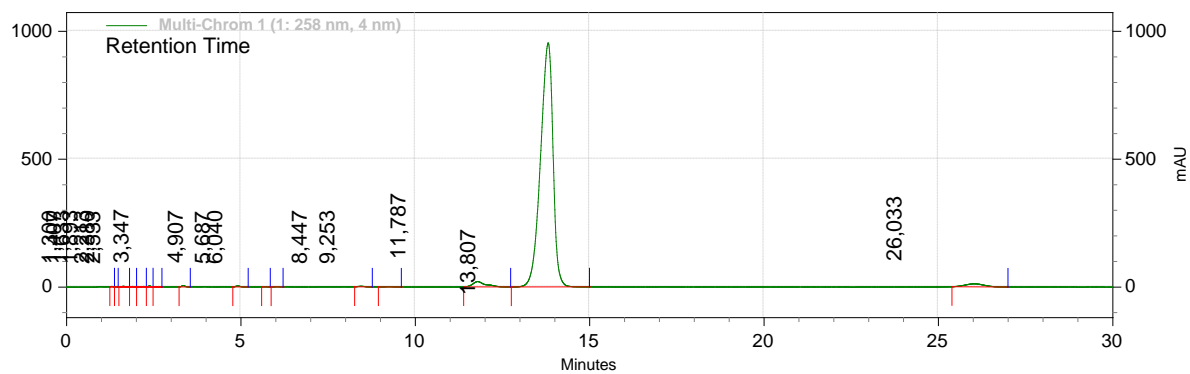

# 3,5-dichloro-*N*-((2-(4-*i*-propylphenoxy)acetamido)methyl)benzamide (11)

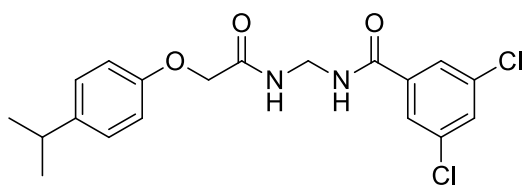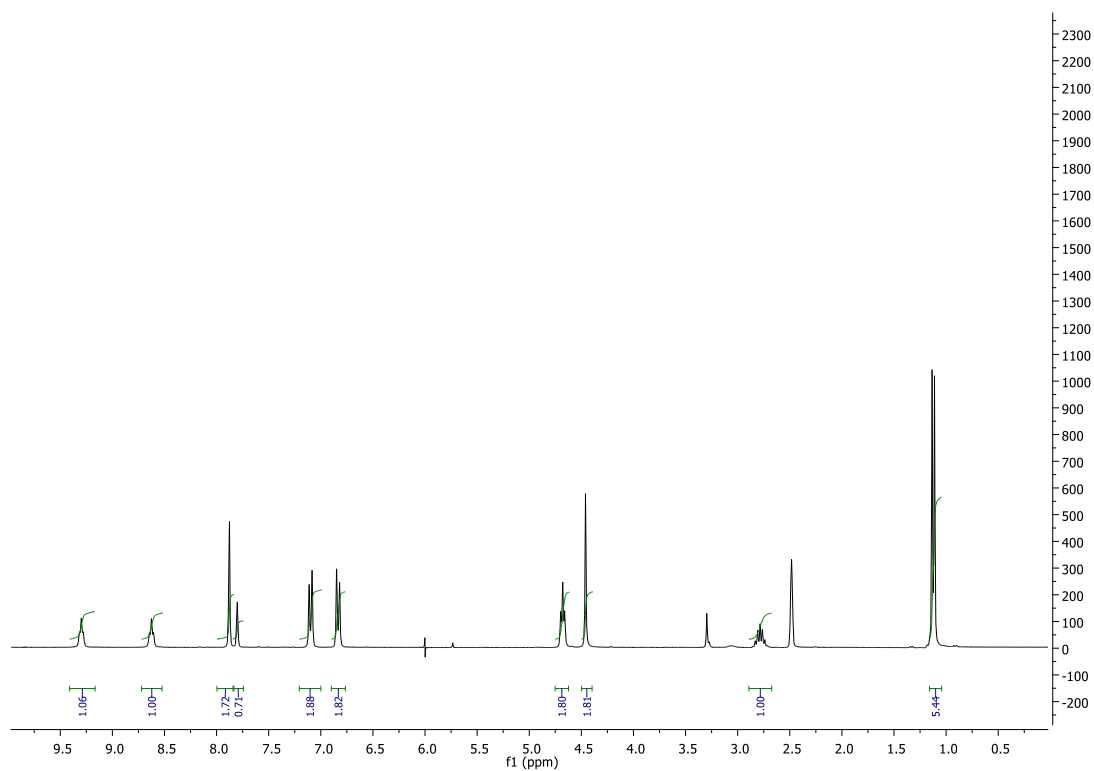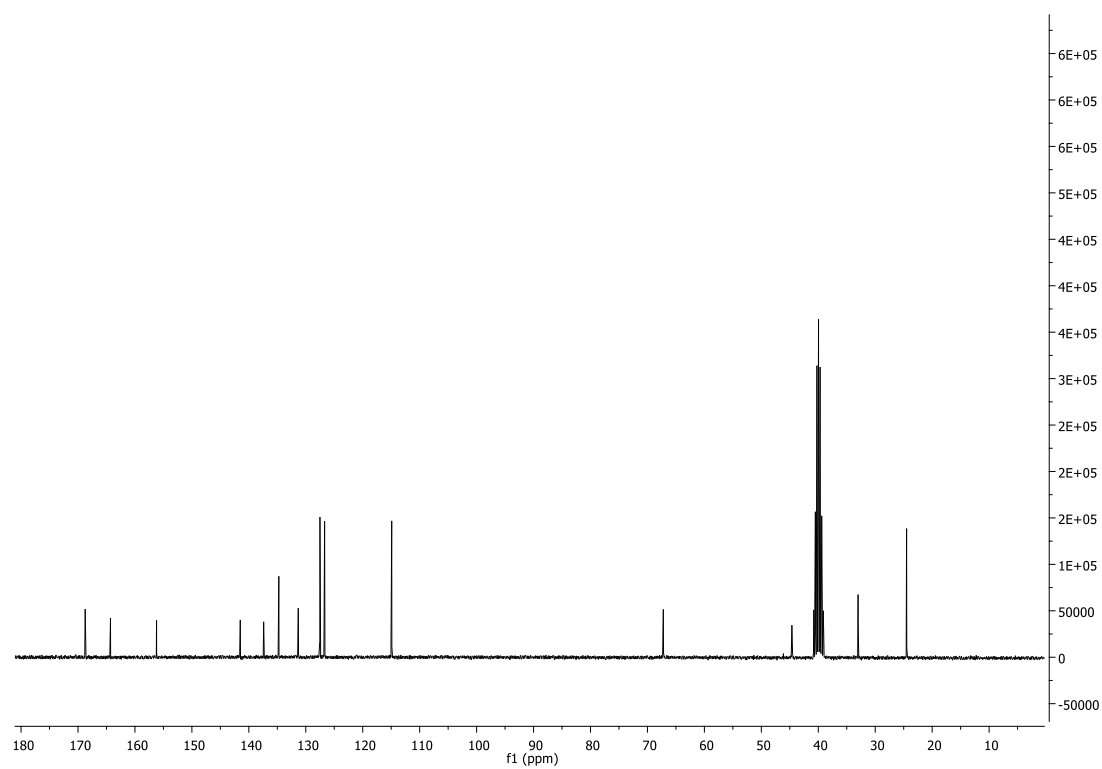

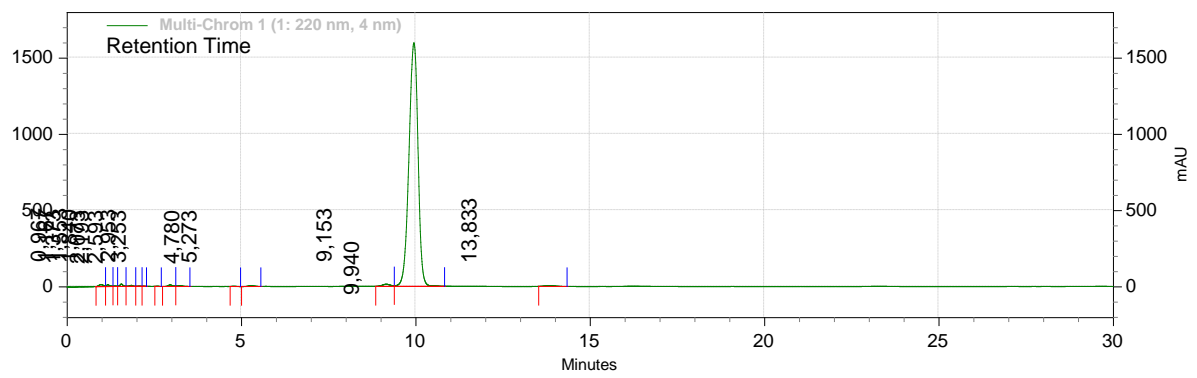

# 3,5-dichloro-N-((2-(4-*i*-propylphenoxy)acetamido)ethyl)benzamide (12)

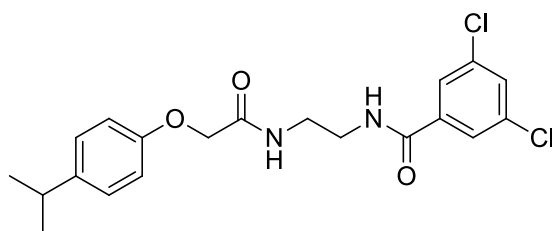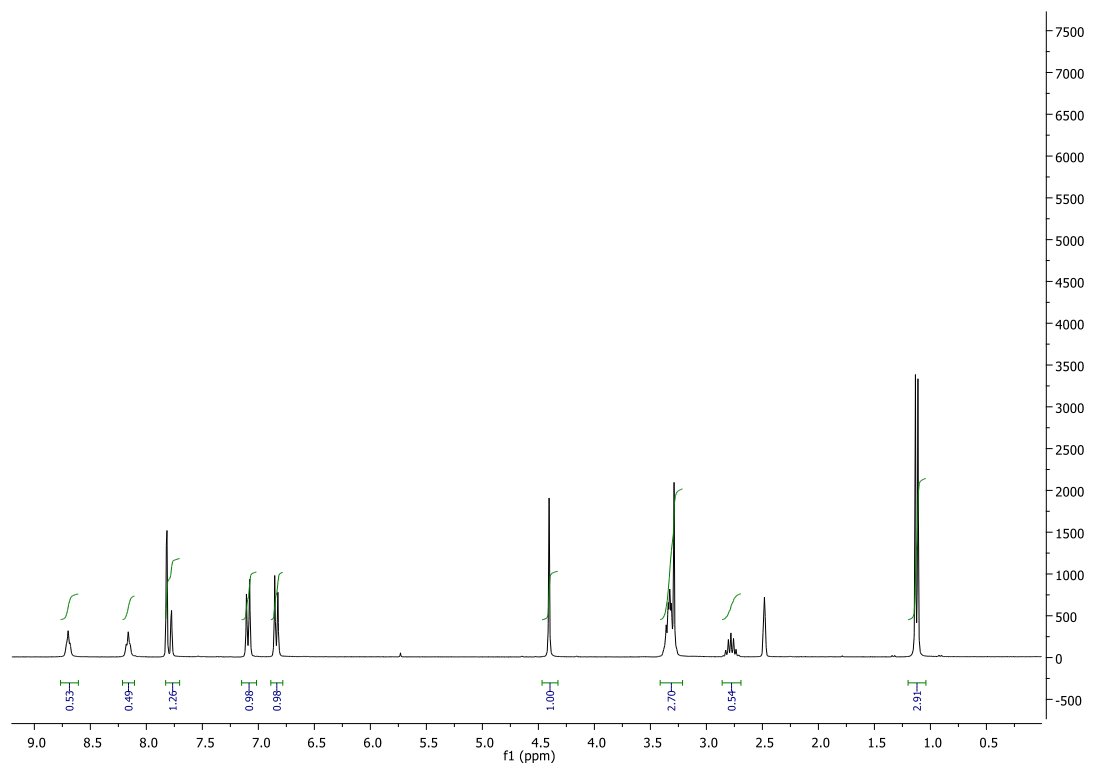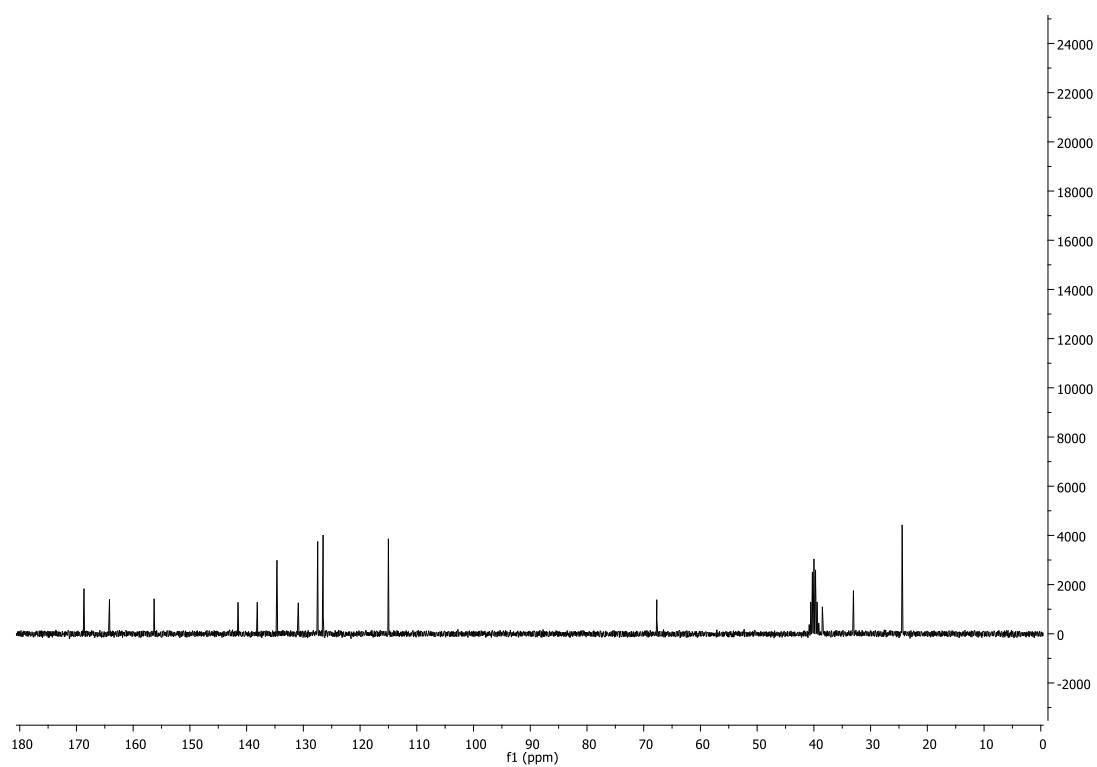



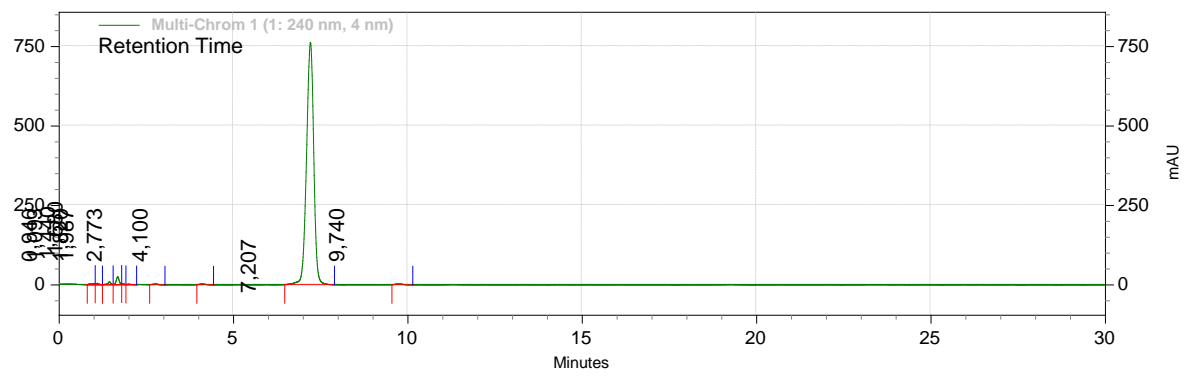

# 4-(3,5-dichlorobenzoylamino)-1-(4-*i*-propylphenoxyacetyl)piperidine (13)

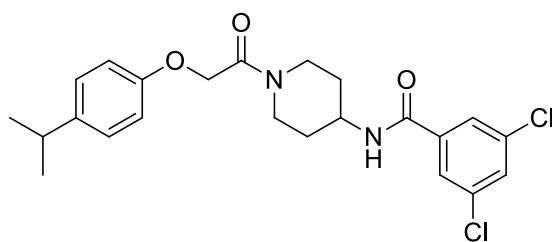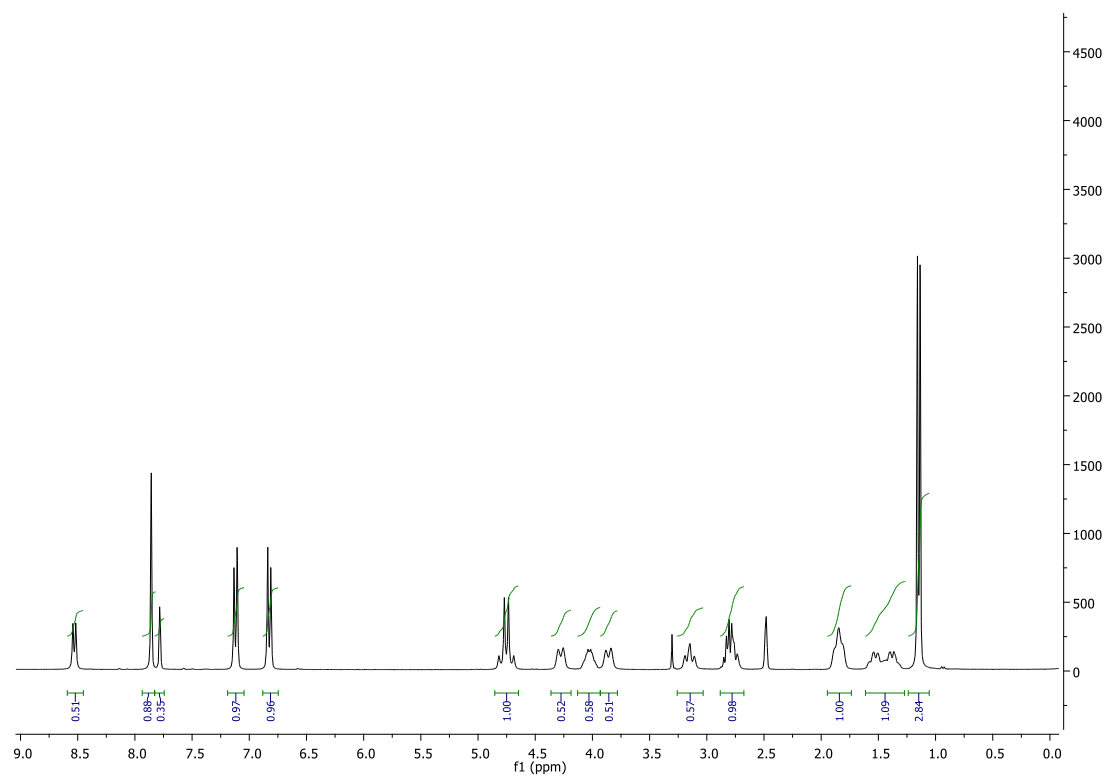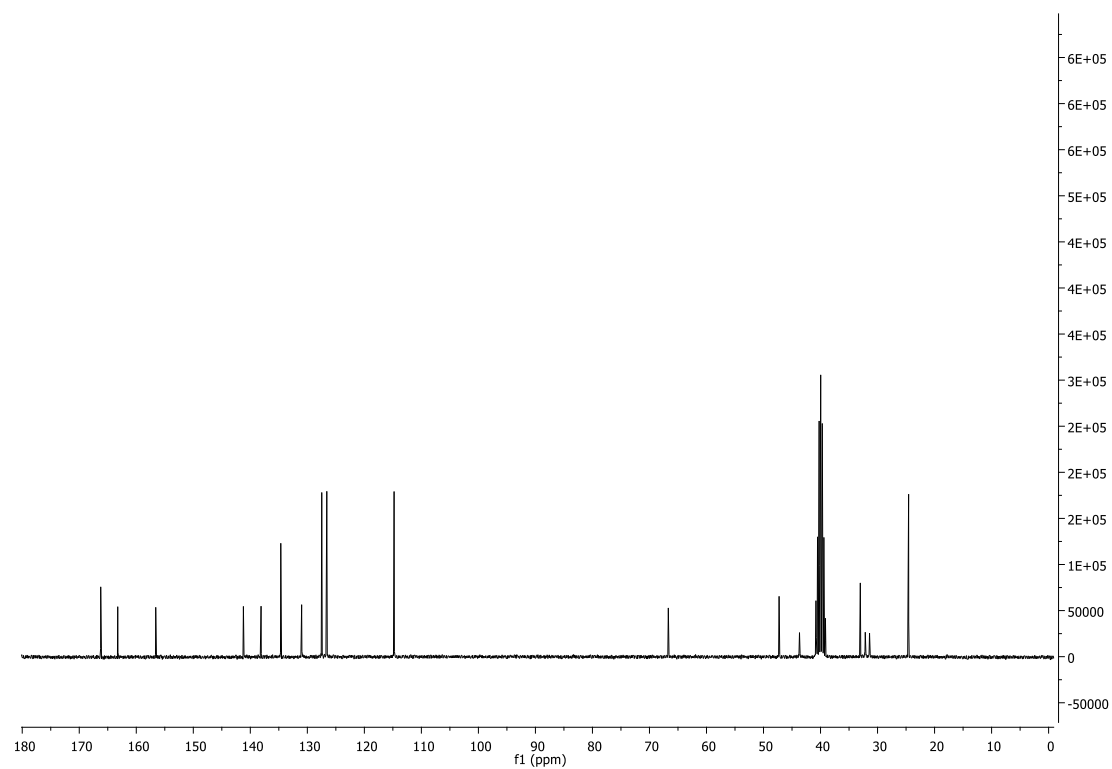

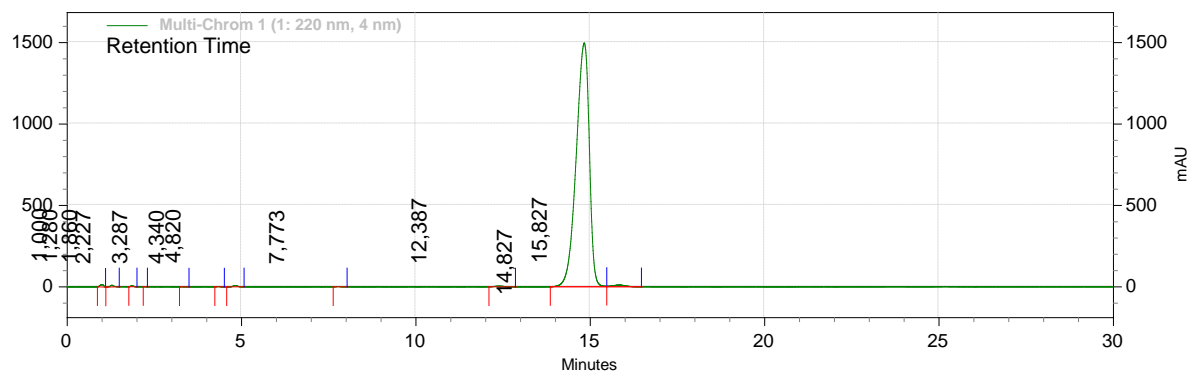

# 4-(3,5-dichlorobenzoyl)-1-(4-*i*-propylphenoxyacetyl)piperazine (14)

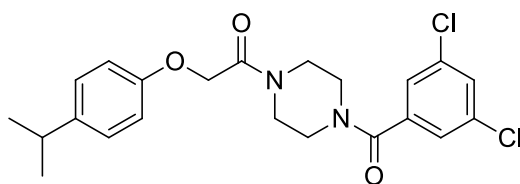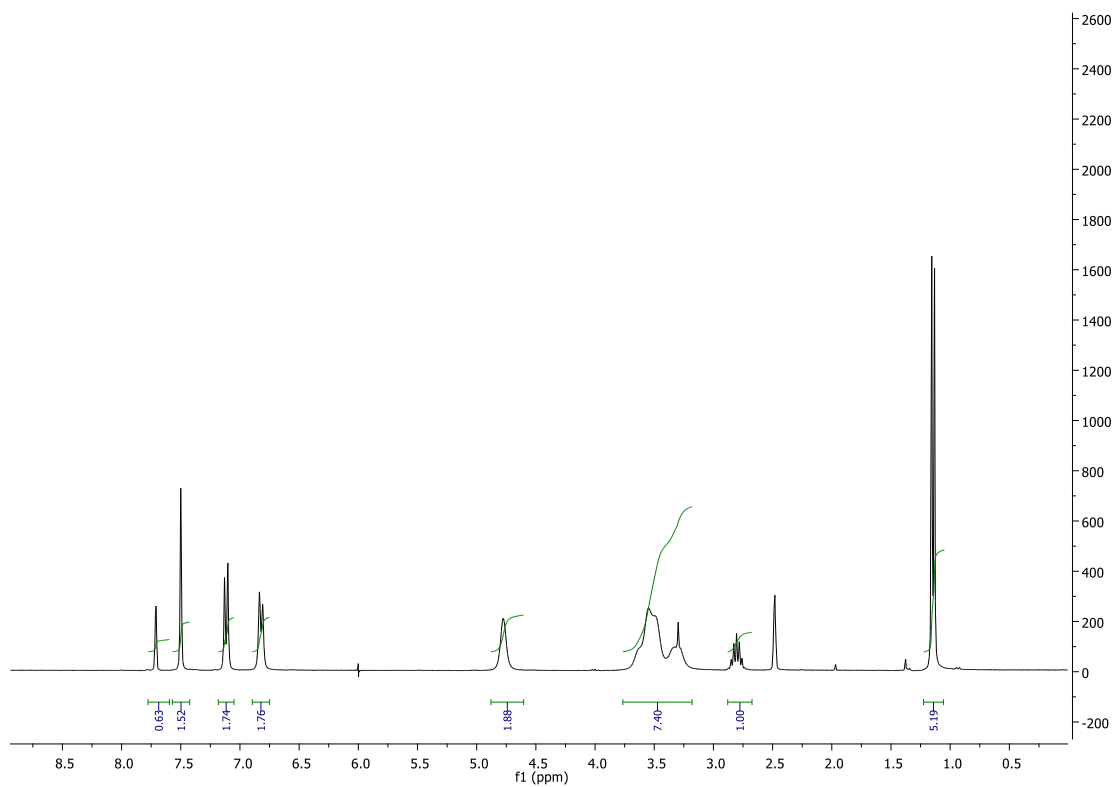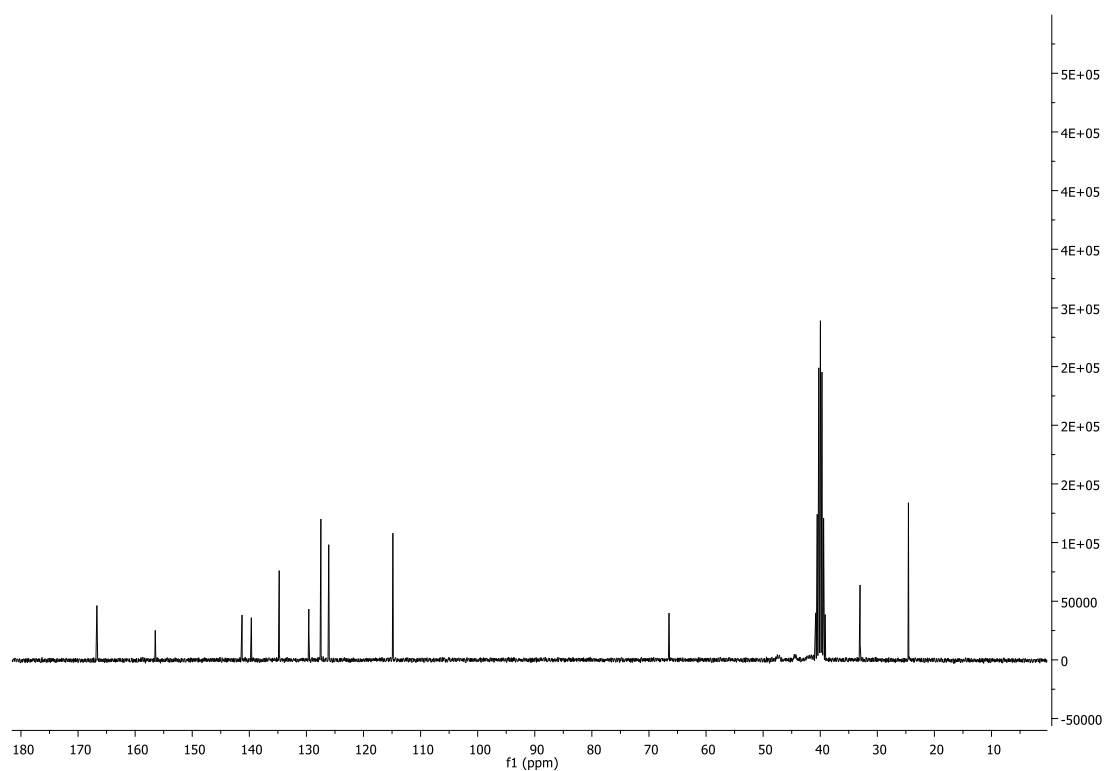

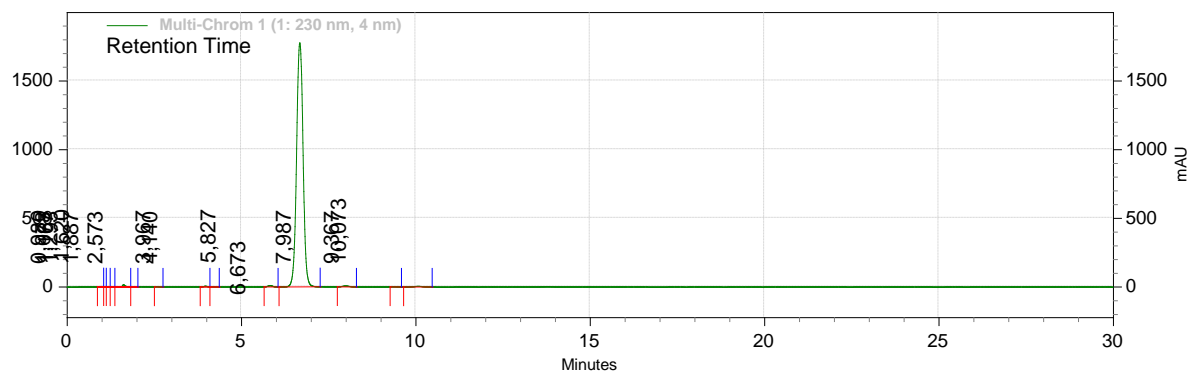

Supplement: s1 [file s1]
